# Supplementary material for: A Thioester-Containing Protein Controls Dengue Virus Infection in Aedes aegypti Through Modulating Immune Response
Source: PubMed Central journal article supplement (PMC8155531; doi:10.3389/fimmu.2021.670122), 2021-05-13
Supplement: DataSheet_1.pdf [file DataSheet_1.pdf]

**Table S1. Primers used in this study.**

|                         |                                                                                   |
|-------------------------|-----------------------------------------------------------------------------------|
| AeTEP1-mir-1-1          | GGCAGCTTACTTAAACTTAATCACAGCCTTTAATGTGAACATCAATTCTACATCTACATAAGTTAATATACCATATC     |
| AeTEP1-mir-1-2          | AATAATGATGTTAGGCACTTTAGGTACGAACATCAATTCTACATCTACATAGATATGGTATATTAAGTTATGTA        |
| AeTEP1-mir-2-1          | GGCAGCTTACTTAAACTTAATCACAGCCTTTAATGTGGAAGGTTCTTACGAAAACACCTAAGTTAATATACCATATC     |
| AeTEP1-mir-2-2          | AATAATGATGTTAGGCACTTTAGGTACGGAAGGTTCTTACGAAAACACCTAGATATGGTATATTAAGTTAGGTG        |
| Mir6.1_5'EcoRI/BglII    | GGCGAATTCCGCCAGATCTTTTAAAGTCCACAACCTCATCAAGGAAAATGAAAGTCAAAGTTGGCAGCTTACTTAAACTTA |
| Mir6.1_3'BamHI/XhoI     | GGCCCTCGAGACGGATCCAAAACGGCATGGTTATTCGTGTGCCAAAAAATAAAAAAAAAATTAATAATGATGTTAGGCAC  |
| pMOS1_fusion_AeCPA-pr-F | GACGAGATCGGCCGGCCCGCCCTGCAGTATCTTTACATGTAGCTTGTGCATTGAATCC                        |
| pMOS1_fusion_AeCPA-pr-R | AGATCTGGCCGAATTCGTTGAAATCTCTGTTGAGCAGAAAAAGAAACGAG                                |
| S7 F                    | TCAGTGTACAAGAAGCTGACCGGA                                                          |
| S7 R                    | TTCCGCGCGCGCTCACTTATTAGATT                                                        |
| DENV F                  | GAAGACATTGACTGYTGGTGCAA                                                           |
| DENV R                  | CGATGTTTCCACGCCCTTC                                                               |
| JAK1 F                  | GGATCAAAGCTGCAAAGTCC                                                              |
| JAK1 R                  | GCAATCGTGTAGGCTCGAA                                                               |
| JAK2 F                  | AAAAGATTCGCCCTCAGAT                                                               |
| JAK2 R                  | ACCTTGCCGTAGTGACCTTG                                                              |
| JAK3 F                  | AATCAAGCGAGCGGAAAAG                                                               |
| JAK3 R                  | AGCGGTTCCCTGCAGAACT                                                               |
| GNBP B6 F               | TTGCTGTTCTGCGTTGTTGG                                                              |
| GNBP B6 R               | TGTC AATGTTGGGCGGATGT                                                             |
| PGRP LD F               | CCGAGCCAAAGTACAACGAT                                                              |
| PGRP LD R               | TGACGGCACCATTCTGTTTA                                                              |
| TEP1 F                  | CCTGTTCCGTGCAGATTGG                                                               |
| TEP1 R                  | GCAATAAGCGGTCAGCCATAC                                                             |
| TEP20 F                 | TGACTTATTGCATGCTACGCCTAT                                                          |
| TEP20 R                 | CCGAGACCATAACGCTGCTT                                                              |

|             |                                          |
|-------------|------------------------------------------|
| CLIPB13B F  | GGGATACAAAGCCAAAATGTTTCCT                |
| CLIPB13B R  | AACGGTCTTTCCGCAATCCT                     |
| CLIPB5 F    | TGGTTGGCGTTGCTCAAGTA                     |
| CLIPB5 R    | CCATTCTCCCAGGCGAACTT                     |
| CTL6 F      | GTGGTCGTAGTGCTACAAATTCT                  |
| CTL6 R      | ATTGCTCTGGATGGTGGAGTAT                   |
| CTLGA8 F    | TTCCCAATTGTTGACGAGGA                     |
| CTLGA8 R    | TCTCCAGGCTTCCAAGAACG                     |
| SRPN21 F    | AACCCAACCCGAAACTGTGT                     |
| SRPN21 R    | AGAGTACTCGGCCTGTAGCA                     |
| SRPN22 F    | GATGGTGCTGCAGAAAGACA                     |
| SRPN22 R    | CGTAAAGCTTGGCGAAAGTC                     |
| IAP2 F      | GGCCAAGGCCGGTTTCTA                       |
| IAP2 R      | TTCACACCAGGCACATTTGAC                    |
| TEP1 RNAi F | TAATACGACTCACTATAGGGTCACGCATCCACTCTTCTTG |
| TEP1 RNAi R | TAATACGACTCACTATAGGGTCTGGTGCTGCAGGATGTAG |
| EGFP F      | ACGACGGCAACTACAAGACC                     |
| EGFP R      | GGGGTGTCTGCTGGTAGTG                      |
